# Supplementary material for: Comparative Analysis Reveals Distinct and Overlapping Functions of Mef2c and Mef2d during Cardiogenesis in Xenopus laevis
Source: PubMed Central journal article supplement (PMC3904989; doi:10.1371/journal.pone.0087294), 2014-01-28
Supplement: pone.0087294.s003.pdf [file pone.0087294.s003.pdf]

**Table S1**      *Gene abbreviations used in Figure 1*

Adamts17: ADAM metalloproteinase with thrombospondin type 1 motif, 17  
Ankrd32: ankyrin repeat domain 32  
Apoa1bp: apolipoprotein A-I binding protein  
Armc6: armadillo repeat containing 6  
Asb7: ankyrin repeat and SOCS box containing 7  
Ccnh: cyclin H  
Cct3: chaperonin containing TCP1, subunit 3 (gamma)  
Cetn3: centrin, EF-hand protein, 3; Tmem161b: transmembrane protein 161B  
Chsy1: chondroitin sulfate synthase 1  
Cox7c: cytochrome c oxidase subunit VIIc  
Edil3: EGF-like repeats and discoidin I-like domains 3  
Fam169b: family with sequence similarity 169, member B  
Fam172a: family with sequence similarity 172, member A  
Gata2a: Gata-binding protein 2a  
Gpatch4: G patch domain containing 4  
Gpr98: G protein-coupled receptor 98  
Hapln4: hyaluronan and proteoglycan link protein 4  
Igf1r: insulin-like growth factor 1 receptor  
Iqgap3: IQ motif containing GTPase activating protein 3  
Lass3: ceramide synthase 3  
Lins: lines homolog  
Lmna: lamin A/C  
Lrrc28: leucine rich repeat containing 28  
Lrrk1: leucine-rich repeat kinase 1  
Lysmd3: LysM, putative peptidoglycan-binding, domain containing 3  
Lysmd4: LysM, putative peptidoglycan-binding, domain containing 4  
Mau2: MAU2 chromatid cohesion factor homolog  
Mblac2: metallo-beta-lactamase domain containing 2  
Mctp1: multiple C2 domains, transmembrane 1  
Mef2bnb: MEF2B neighbor  
Ncan: neurocan; Nr2c2ap: nuclear receptor 2C2-associated protein  
Pcsk6: proprotein convertase subtilisin/kexin type 6

Pgpep 11: pyroglutamyl-peptidase I-like

Pmf1: polyamine-modulated factor 1

Polr3G: polymerase (RNA) III (DNA directed) polypeptide G

Rab25: RAB25, member RAS oncogene family

Rasa1: RAS p21 protein activator (GTPase activating protein) 1

Rfxank: regulatory factor X-associated ankyrin-containing protein

Rhbg: Rh family, B glycoprotein (gene/pseudogene)

Sema4a: sema domain, immunoglobulin domain (Ig), transmembrane domain (TM) and short cytoplasmic domain, (semaphorin) 4A

Slc25a42: solute carrier family 25, member 42

Smg5: smg-5 homolog, nonsense mediated mRNA decay factor (*C. elegans*)

Supp1: SURP and G patch domain containing 1

Synm: synemin, intermediate filament protein

Tm6sf2: transmembrane 6 superfamily member 2

Tmem161a: transmembrane protein 161A

Ttc23: tetratricopeptide repeat domain 23

Ttc24: tetratricopeptide repeat domain 24

Ubqln4: ubiquilin 4
